# Supplementary material
Source: publisher figshare collection journal article supplement (https://gsajournals.figshare.com/ndownloader/files/24788231)
Supplement: Supplementary file 1 [file 24788231]

# minimal eve stripe 2 in the �gt-2 eve locus
# Start: 0
# Length: 445
Class	Start	Length	Motif_Type	Strength
binding_site	88	8	bcd_cell2008	11.98
binding_site	315	8	bcd_cell2008	11.53
binding_site	436	8	bcd_cell2008	10.88
binding_site	50	9	cad_flyreg	8.17
binding_site	136	9	cad_flyreg	7.1
binding_site	405	9	cad_flyreg	7.6
binding_site	37	12	kni_SANGER_pc1	11.12
binding_site	60	12	kni_SANGER_pc1	11.37
binding_site	248	12	kni_SANGER_pc1	8.43
binding_site	294	10	hb_NAR_pc01	6.2
binding_site	298	10	hb_NAR_pc01	7.62
binding_site	302	10	hb_NAR_pc01	7.62
binding_site	407	10	hb_NAR_pc01	7.38
binding_site	409	10	hb_NAR_pc01	4.85
binding_site	89	7	bcd_wolfe_pc01	9.36
binding_site	315	7	bcd_wolfe_pc01	9.91
binding_site	342	7	bcd_wolfe_pc01	7.52
binding_site	366	7	bcd_wolfe_pc01	7.52
binding_site	372	7	bcd_wolfe_pc01	7.52
binding_site	378	7	bcd_wolfe_pc01	7.52
binding_site	436	7	bcd_wolfe_pc01	9.91
binding_site	8	14	gt_nar2008	9.73
binding_site	38	12	kni_nar	8.29
binding_site	59	12	kni_nar	11.57
binding_site	249	12	kni_nar	7.25
binding_site	294	10	hb_nar2008	8.55
binding_site	298	10	hb_nar2008	9.7
binding_site	302	10	hb_nar2008	9.7
binding_site	407	10	hb_nar2008	9.45
binding_site	409	10	hb_nar2008	7.15
binding_site	38	12	kni_NAR_pc1	7.44
binding_site	59	12	kni_NAR_pc1	11.56
binding_site	249	12	kni_NAR_pc1	7.12
binding_site	293	11	hb_SOLEXA_pc1	5.43
binding_site	407	11	hb_SOLEXA_pc1	7.43
binding_site	11	12	gt_gaul	6.69
binding_site	11	12	gt_gaul	6.69
binding_site	114	12	gt_gaul	7.17
binding_site	114	12	gt_gaul	7.17
binding_site	11	12	gt_gaul_pc1	7.07
binding_site	11	12	gt_gaul_pc1	7.07
binding_site	114	12	gt_gaul_pc1	7.22
binding_site	114	12	gt_gaul_pc1	7.22
binding_site	406	8	cad_SOLEXA_pc05	8.64
binding_site	406	8	cad_cell_pc1	8.44
binding_site	406	8	cad_cell2008	8.28
binding_site	11	12	gt_gaul_pc05	6.71
binding_site	11	12	gt_gaul_pc05	6.71
binding_site	114	12	gt_gaul_pc05	7.68
binding_site	114	12	gt_gaul_pc05	7.68
binding_site	89	7	bcd_NAR_pc05	9.31
binding_site	315	7	bcd_NAR_pc05	9.27
binding_site	342	7	bcd_NAR_pc05	7.39
binding_site	366	7	bcd_NAR_pc05	7.39
binding_site	372	7	bcd_NAR_pc05	7.39
binding_site	378	7	bcd_NAR_pc05	7.39
binding_site	436	7	bcd_NAR_pc05	9.27
binding_site	88	15	kr_solexa	9.85
binding_site	234	15	kr_solexa	9.42
binding_site	429	15	kr_solexa	8.56
binding_site	406	7	cad_wolfe_pc01	8.63
binding_site	90	11	Kr_wolfe_pc1	10.44
binding_site	431	11	Kr_wolfe_pc1	11.04
binding_site	38	12	kni_Gaul	8.86
binding_site	59	12	kni_Gaul	9.96
binding_site	406	7	cad_new4nar	8.11
binding_site	292	13	hb_SANGER_pc01	3.83
binding_site	293	13	hb_SANGER_pc01	5.5
binding_site	297	13	hb_SANGER_pc01	4
binding_site	301	13	hb_SANGER_pc01	4.55
binding_site	407	13	hb_SANGER_pc01	5.7
binding_site	37	12	kni_SANGER_pc01	12.1
binding_site	60	12	kni_SANGER_pc01	12.03
binding_site	248	12	kni_SANGER_pc01	5.83
binding_site	89	7	bcd_SOLEXA_pc01	11.01
binding_site	315	7	bcd_SOLEXA_pc01	10.84
binding_site	436	7	bcd_SOLEXA_pc01	10.84
binding_site	38	12	kni_NAR_pc01	8.2
binding_site	59	12	kni_NAR_pc01	12.26
binding_site	88	8	bcd_cell_pc1	12.2
binding_site	315	8	bcd_cell_pc1	11.61
binding_site	436	8	bcd_cell_pc1	10.87
binding_site	362	10	kni_flyreg	8.87
binding_site	8	14	gt_FFS_pc1	9.94
binding_site	406	7	cad_wolfe_pc1	8.21
binding_site	295	8	hb_wolfe_pc01	6.19
binding_site	299	8	hb_wolfe_pc01	6.19
binding_site	303	8	hb_wolfe_pc01	6.19
binding_site	408	8	hb_wolfe_pc01	5.64
binding_site	410	8	hb_wolfe_pc01	6.19
binding_site	406	8	cad_SOLEXA_pc01	8.65
binding_site	324	8	kr_sanger5	7.8
binding_site	89	7	bcd_SOLEXA_pc1	10.96
binding_site	315	7	bcd_SOLEXA_pc1	10.79
binding_site	436	7	bcd_SOLEXA_pc1	10.79
binding_site	292	13	hb_sanger25	6.4
binding_site	293	13	hb_sanger25	7.63
binding_site	297	13	hb_sanger25	6.24
binding_site	301	13	hb_sanger25	6.79
binding_site	407	13	hb_sanger25	7.54
binding_site	295	8	hb_new48	8.41
binding_site	299	8	hb_new48	8.41
binding_site	303	8	hb_new48	8.41
binding_site	408	8	hb_new48	7.86
binding_site	410	8	hb_new48	8.41
binding_site	89	7	bcd_new5nar	8.47
binding_site	315	7	bcd_new5nar	9.02
binding_site	342	7	bcd_new5nar	7.06
binding_site	366	7	bcd_new5nar	7.06
binding_site	372	7	bcd_new5nar	7.06
binding_site	378	7	bcd_new5nar	7.06
binding_site	436	7	bcd_new5nar	9.02
binding_site	89	8	bcd_flyreg	10.12
binding_site	109	8	bcd_flyreg	7.51
binding_site	314	8	bcd_flyreg	10.12
binding_site	366	8	bcd_flyreg	7.46
binding_site	372	8	bcd_flyreg	7.46
binding_site	378	8	bcd_flyreg	7.46
binding_site	435	8	bcd_flyreg	10.12
binding_site	295	8	hb_wolfe_pc1	8.41
binding_site	299	8	hb_wolfe_pc1	8.41
binding_site	303	8	hb_wolfe_pc1	8.41
binding_site	408	8	hb_wolfe_pc1	7.86
binding_site	410	8	hb_wolfe_pc1	8.41
binding_site	294	10	hb_NAR_pc05	8.08
binding_site	298	10	hb_NAR_pc05	9.36
binding_site	302	10	hb_NAR_pc05	9.36
binding_site	407	10	hb_NAR_pc05	9.12
binding_site	409	10	hb_NAR_pc05	6.7
binding_site	89	7	bcd_wolfe_pc1	8.56
binding_site	315	7	bcd_wolfe_pc1	9.11
binding_site	342	7	bcd_wolfe_pc1	7.15
binding_site	366	7	bcd_wolfe_pc1	7.15
binding_site	372	7	bcd_wolfe_pc1	7.15
binding_site	378	7	bcd_wolfe_pc1	7.15
binding_site	436	7	bcd_wolfe_pc1	9.11
binding_site	89	7	bcd_NAR_pc1	8.82
binding_site	315	7	bcd_NAR_pc1	8.78
binding_site	342	7	bcd_NAR_pc1	7.11
binding_site	366	7	bcd_NAR_pc1	7.11
binding_site	372	7	bcd_NAR_pc1	7.11
binding_site	378	7	bcd_NAR_pc1	7.11
binding_site	436	7	bcd_NAR_pc1	8.78
binding_site	89	7	bcd_wolfe_pc05	8.98
binding_site	315	7	bcd_wolfe_pc05	9.53
binding_site	342	7	bcd_wolfe_pc05	7.36
binding_site	366	7	bcd_wolfe_pc05	7.36
binding_site	372	7	bcd_wolfe_pc05	7.36
binding_site	378	7	bcd_wolfe_pc05	7.36
binding_site	436	7	bcd_wolfe_pc05	9.53
binding_site	90	11	kr_nar	10.19
binding_site	431	11	kr_nar	10.81
binding_site	89	7	bcd_SOLEXA_pc05	10.98
binding_site	315	7	bcd_SOLEXA_pc05	10.82
binding_site	436	7	bcd_SOLEXA_pc05	10.82
binding_site	37	12	kni_SANGER_pc05	11.64
binding_site	60	12	kni_SANGER_pc05	11.74
binding_site	248	12	kni_SANGER_pc05	7.82
binding_site	292	13	hb_SANGER_pc1	6.21
binding_site	293	13	hb_SANGER_pc1	7.8
binding_site	297	13	hb_SANGER_pc1	6.4
binding_site	301	13	hb_SANGER_pc1	6.95
binding_site	407	13	hb_SANGER_pc1	7.7
binding_site	38	12	kni_NAR_pc05	7.85
binding_site	59	12	kni_NAR_pc05	11.94
binding_site	249	12	kni_NAR_pc05	6.54
binding_site	88	15	Kr_SOLEXA_pc1	9.86
binding_site	234	15	Kr_SOLEXA_pc1	9.4
binding_site	429	15	Kr_SOLEXA_pc1	8.56
binding_site	89	7	bcd_NAR_pc01	9.75
binding_site	315	7	bcd_NAR_pc01	9.71
binding_site	342	7	bcd_NAR_pc01	7.62
binding_site	366	7	bcd_NAR_pc01	7.62
binding_site	372	7	bcd_NAR_pc01	7.62
binding_site	378	7	bcd_NAR_pc01	7.62
binding_site	436	7	bcd_NAR_pc01	9.71
binding_site	114	12	gt_gaul_pc01	8.09
binding_site	114	12	gt_gaul_pc01	8.09
binding_site	406	7	cad_wolfe_pc05	8.43
binding_site	408	8	hb_flyreg	8.54
binding_site	406	8	cad_SOLEXA_pc1	8.64
binding_site	406	8	cad_solexa	8.63
binding_site	292	13	hb_SANGER_pc05	5.74
binding_site	293	13	hb_SANGER_pc05	7.37
binding_site	297	13	hb_SANGER_pc05	5.93
binding_site	301	13	hb_SANGER_pc05	6.48
binding_site	407	13	hb_SANGER_pc05	7.41
